# Supplementary material
Source: PubMed Central journal article supplement (PMC4587686)
Supplement: ASN.2014060543_ASN2014060543SupplementaryData1.pdf [file ASN.2014060543_ASN2014060543SupplementaryData1.pdf]

**Supplementary Table 1. The primer sequences**

| <b>Genes</b>         | <b>Forward</b>               | <b>Reverse</b>               |
|----------------------|------------------------------|------------------------------|
| ANF (Rat)            | 5'-ATGGGCTCCTTCTCCATCAC-3'   | 5'-TTCATCGGTATGCTCGCTCA-3'   |
| BNP (Rat)            | 5'-TGGGAAGTCCTAGCCAGTCT-3'   | 5'-GATCCGGTCTATCTTCTGCC-3'   |
| $\beta$ -MHC (Rat)   | 5'-TGACAGATCGGGAGAACCAG-3'   | 5'-CCGAAGTGTCTTGGCATTGC-3'   |
| GAPDH (Rat)          | 5'-CTGCACCACCAACTGCTTAG-3'   | 5'-TCAGCTCTGGGATGACCTTG-3'   |
| Klotho (Mouse)       | 5'-GAGCGGTCACTAAGCGAATACG-3' | 5'-CGTGAATGAGGCTCTGAAAGC-3'  |
| ANF (Mouse)          | 5'-GGAGGAGAAGATGCCGGTAGA-3'  | 5'-GCTTCCTCAGTCTGCTCACTCA-3' |
| BNP (Mouse)          | 5'-AAGCTGCTGGAGCTGATAAGA-3'  | 5'-GTTACAGCCCAAACGACTGAC-3'  |
| $\beta$ -MHC (Mouse) | 5'-GTGCCAAGGGCCTGAATGAG-3'   | 5'-GCAAAGGCTCCAGGTCTGA-3'    |
| GAPDH (Mouse)        | 5'-CCAAGGTCATCCATGACAACT-3'  | 5'-GGGCCATCCACAGTCTTCT-3'    |
