# Supplementary material
Source: PubMed Central journal article supplement (PMC4587686)
Supplement: ASN.2014060543_ASN2014060543SupplementaryData2.pdf [file ASN.2014060543_ASN2014060543SupplementaryData2.pdf]

### Supporting data: the result of Covariance analysis

The following supplementary table is the result of standard interaction analysis using Covariance analysis with SPSS 13.0. The interactive relationship between the two regression lines was highlighted with red color.

**Tests of Between-Subjects Effects**

Dependent Variable: ISumol/L

| Source              | Type I Sum of Squares    | df       | Mean Square      | F             | Sig.        |
|---------------------|--------------------------|----------|------------------|---------------|-------------|
| Corrected Model     | 1144627.746 <sup>a</sup> | 3        | 381542.582       | 64.973        | .000        |
| Intercept           | 1454216.515              | 1        | 1454216.515      | 247.637       | .000        |
| Group               | 597251.111               | 1        | 597251.111       | 101.705       | .000        |
| LVMI                | 475803.791               | 1        | 475803.791       | 81.024        | .000        |
| <b>Group * LVMI</b> | <b>71572.843</b>         | <b>1</b> | <b>71572.843</b> | <b>12.188</b> | <b>.001</b> |
| Error               | 481534.136               | 82       | 5872.368         |               |             |
| Total               | 3080378.396              | 86       |                  |               |             |
| Corrected Total     | 1626161.881              | 85       |                  |               |             |

a. R Squared = .704 (Adjusted R Squared = .693)
